# Supplementary material for: Distinctive electronic transport in pyridine-based devices with narrow graphene nanoribbon electrodes
Source: Royal Society of Chemistry journal article supplement (doi:10.1039/c7ra09552j), 2017-01-01
Supplement: c7ra09552j1.pdf [file c7ra09552j1.pdf]

**Supporting Information for: Distinctive Electronic  
Transport in Pyridine-based Devices with Narrow Graphene  
Nanoribbons Electrodes**

Jie Li, Yunrui Duan, Yi Zhou, Tao Li, Zhenyang Zhao, Long-Wei Yin,  
Hui Li\*

*Key Laboratory for Liquid-Solid Structural Evolution and Processing of  
Materials, Ministry of Education, Shandong University, Jinan 250061,  
People's Republic of China.*

Email\*: [lihuilmy@hotmail.com](mailto:lihuilmy@hotmail.com)

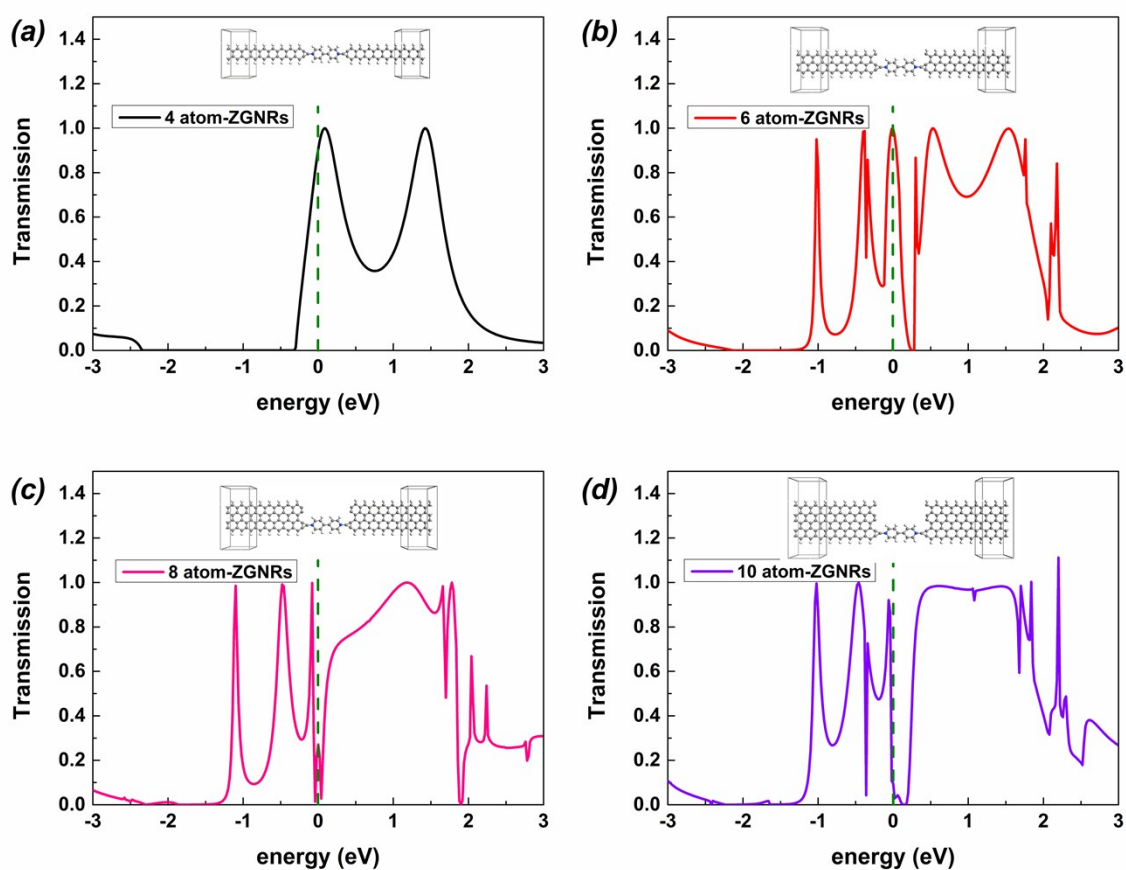

**Figure S1** (a)-(d) Transmission spectra of the 4, 4'-bipyridine-based devices with 4-atoms, 6-atoms, 8-atoms and 10-atoms wide ZGNRs electrodes respectively; the insets are structures of these devices.

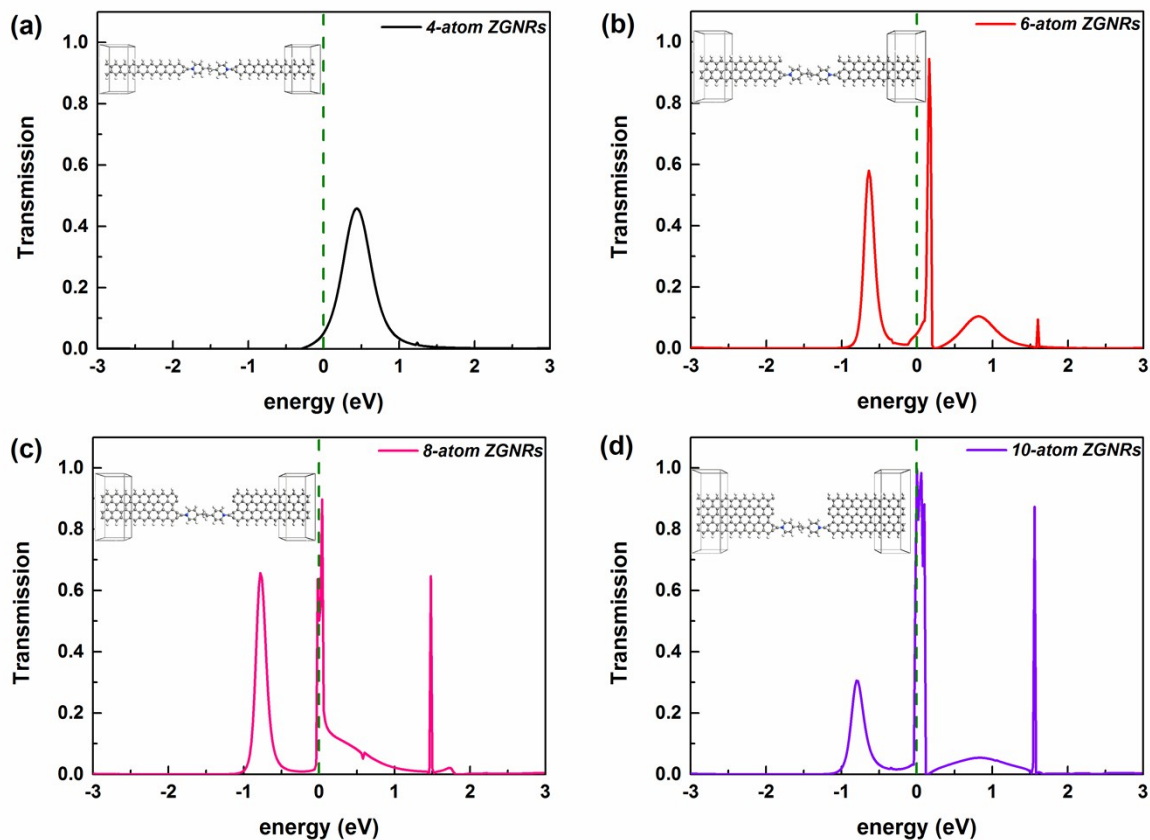

**Figure S2** (a)-(d) Transmission spectra of the 4, 4'-ethylenedipyridine-based devices with 4-atoms, 6-atoms, 8-atoms and 10-atoms wide ZGNRs electrodes respectively; the insets are structures of these devices.

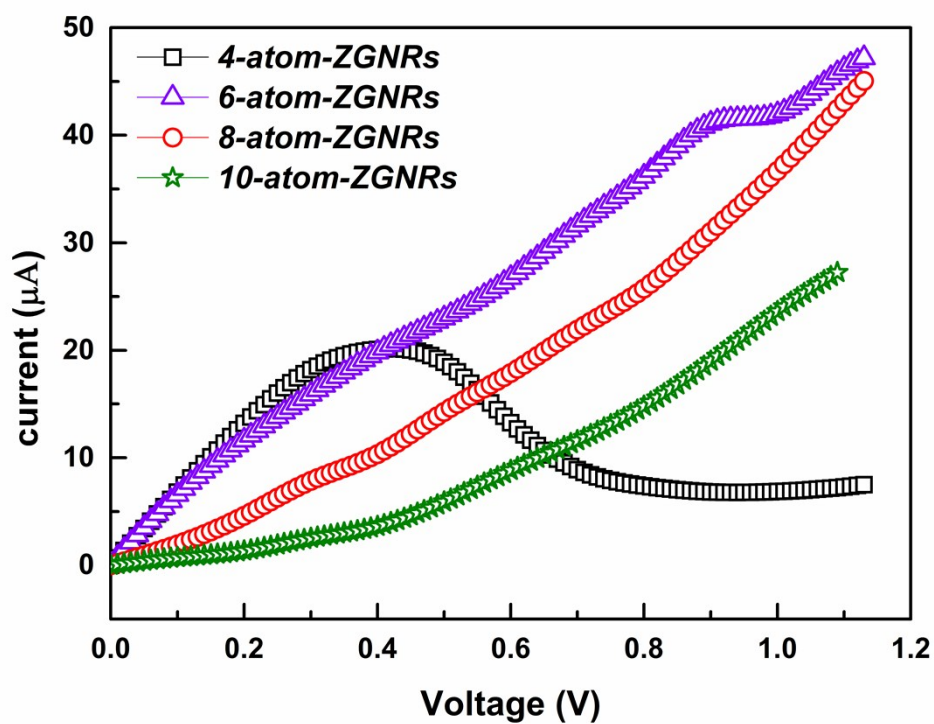

**Figure S3** I-V curves of the 4, 4'-bipyridine-based devices with 4-atoms, 6-atoms, 8-atoms and 10-atoms wide ZGNRs electrodes in a bias region [0V, 1.2V].

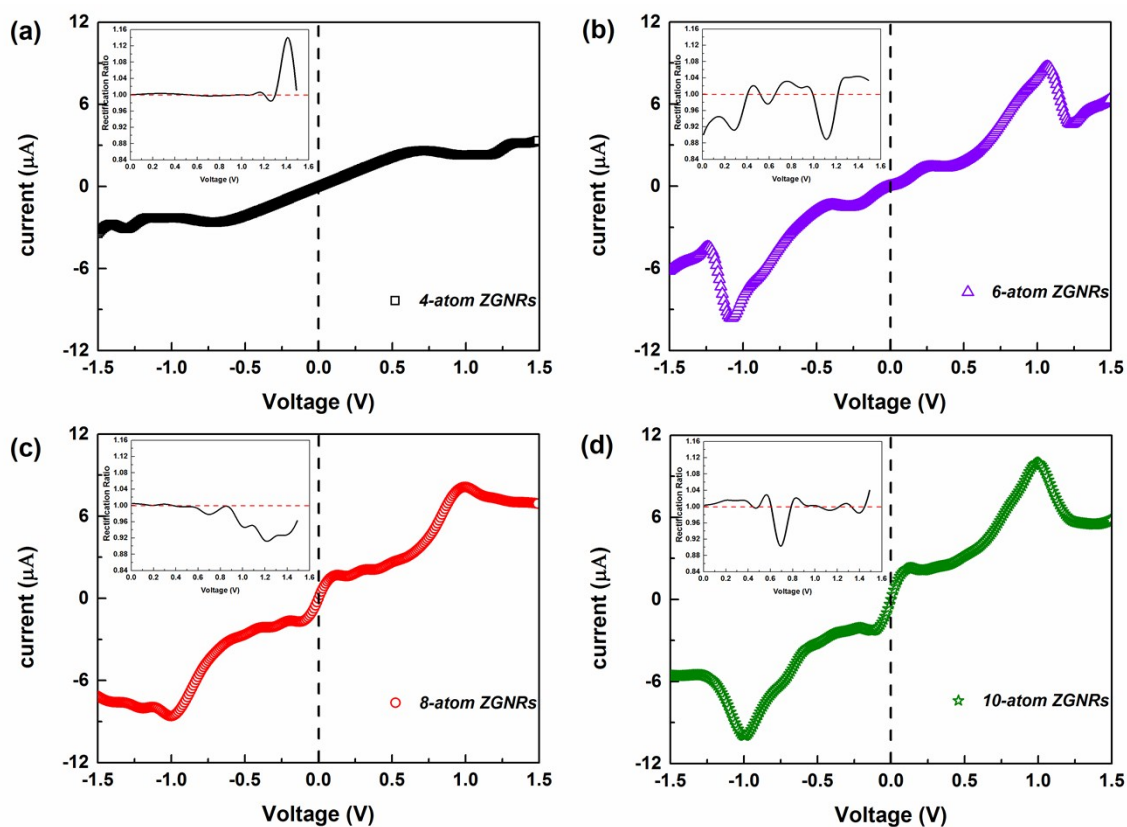

**Figure S4** (a-d) I-V curves of the 4, 4'-ethylenedipyridine-based devices with 4-atoms, 6-atoms, 8-atoms and 10-atoms wide ZGNRs electrodes respectively in a bias region  $[-1.5\text{V}, 1.5\text{V}]$  and the corresponding rectification ratio as a function of the bias is presented in the insets.

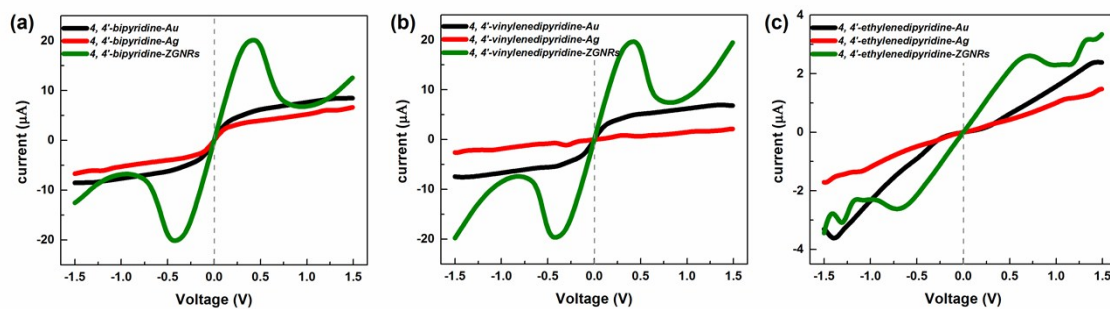

**Figure S5** (a-c) I-V curves of metal (Au, Ag)-based devices and ZGNRs-based device with the core molecule of 4, 4'-bipyridine, 4, 4'-vinylenedipyridine and 4, 4'-ethylenedipyridine respectively.

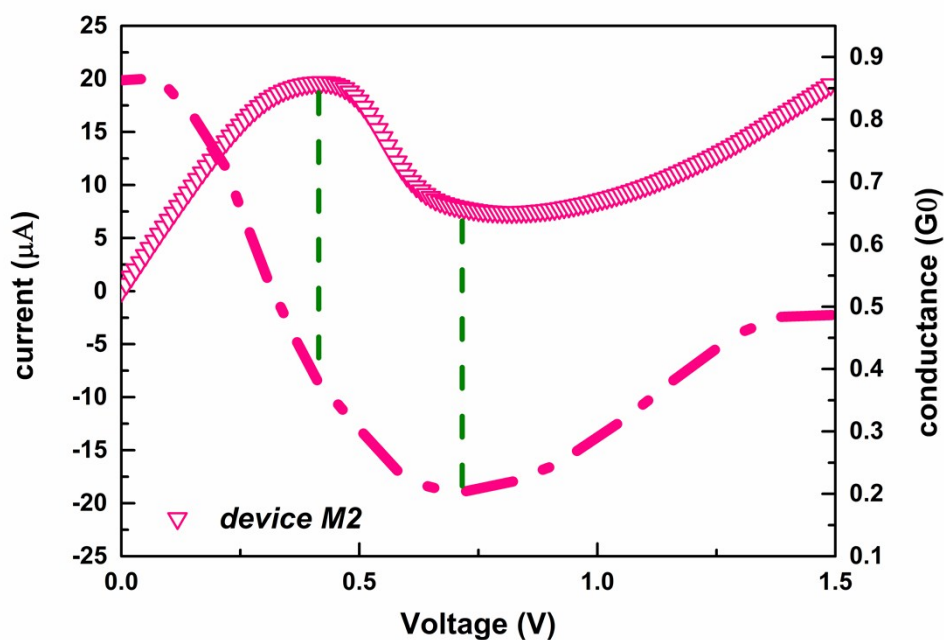

**Figure S6** Current and quantum conductance of the device M2 under the bias [0V, 1.5V]. The segment of I-V curve inside the dash line denotes the current-dropping stage.
